# Supplementary material
Source: Research Square preprint supplement (doi:10.21203/rs.3.rs-9957950/v1)
Supplement: Supplementary file 1 [file 8d9e06265d55c3315611295e.docx]

**Web Appendices for**

**The Unintended Consequences of Curbing Household Speculative Housing Demand on Bank Channel Operations**

**WEB APPENDIX A. SUPPLEMENTAL FIGURES AND TABLES**

**A.1. Implementation and Elimination Timelines of HPR Policy**

Table A1 shows the implementation and elimination timelines of the HPR policy in 46 major cities in China. The implementation period ranges from May 2010 to November 2011 for these 46 cities. Except for Beijing, Shanghai, Guangzhou, Shenzhen, Zhuhai, and Sanya, other cities gradually eliminated the HPR policy between July2014 and May 2015. The detail HPR information can be obtained from websites published by city governments.

Table A1. Policies Implementation and Elimination Time of the 46 HBR Cities

| City | Implementation Time | Elimination Time |
| --- | --- | --- |
| Beijing | 2010.5 | - |
| Shenzhen | 2010.10 | - |
| Xiamen | 2010.10 | 2015.1 |
| Shanghai | 2010.10 | - |
| Ningbo | 2010.10 | 2014.8 |
| Fuzhou | 2010.10 | 2014.8 |
| Hangzhou | 2010.10 | 2014.8 |
| Haikou | 2010.10 | 2014.8 |
| Nanjing | 2010.10 | 2014.9 |
| Wenzhou | 2010.10 | 2014.7 |
| Guangzhou | 2010.10 | - |
| Tianjin | 2010.10 | 2014.10 |
| Sanya | 2010.10 | - |
| Zhengzhou | 2011.1 | 2014.8 |
| Taiyuan | 2011.1 | 2014.8 |
| Kunming | 2011.1 | 2014.8 |
| Jinan | 2011.1 | 2014.7 |
| Hefei | 2011.1 | 2014.8 |
| Qingdao | 2011.2 | 2014.9 |
| Chengdu | 2011.2 | 2015.1 |
| Guiyang | 2011.2 | 2014.9 |
| Shijiazhuang | 2011.2 | 2014.9 |
| Wuxi | 2011.2 | 2014.8 |
| Wuhan | 2011.2 | 2014.9 |
| Yinchuan | 2011.2 | 2014.8 |
| Nanchang | 2011.2 | 2014.8 |
| Harbin | 2011.2 | 2014.8 |
| Shenyang | 2011.3 | 2014.9 |
| Dalian | 2011.3 | 2014.9 |
| Xi 'an | 2011.3 | 2014.9 |
| Lanzhou | 2011.3 | 2014.9 |
| Nanning | 2011.3 | 2014.10 |
| Suzhou | 2011.3 | 2014.9 |
| Changsha | 2011.3 | 2014.8 |
| Urumqi | 2011.3 | 2014.10 |
| Foshan | 2011.3 | 2015.5 |
| Xining | 2011.3 | 2014.9 |
| Jinhua | 2011.3 | 2014.8 |
| Hohhot | 2011.4 | 2014.6 |
| Shaoxing | 2011.4 | 2014.8 |
| Xuzhou | 2011.5 | 2014.8 |
| Changchun | 2011.5 | 2015.6 |
| Zhoushan | 2011.8 | 2014.8 |
| Taizhou | 2011.9 | 2014.8 |
| Quzhou | 2011.9 | 2014.7 |
| Zhuhai | 2011.11 | - |

Notes: This table shows the time series of HPR policies implemented and eliminated in 46 cities. The implementation of HPR began on April 30, 2010. Since it was the last day of April, we consider that Beijing officially started implementing the policy in May. Beijing, Shanghai, Guangzhou, Shenzhen, Zhuhai, and Sanya still maintain the HPR policy, while other cities have eliminated it. In addition, the intensity of HPR varied among cities and is not within the scope of our research.

**A.2. Definition and Sources of Variables**

Table A2 describes the definitions of variables and their sources. Housing Purchase Restrictions is a dummy variable that reflects the implementation of the HPR policy. Bank Channel Expansion is the dependent variable, while the others are control variables used in our research.

Table A2. Definition and Sources of Variables

| **Variables** | **Definition** | **Sources** |
| --- | --- | --- |
| Housing Purchase Restrictions | = 1 if the HPR policy has been implemented in this city, 0 otherwise. | Official documents released by each city |
| Bank Channel Expansion | Number of new bank retail branches established by banks in each city every month | China Banking Regulatory Commission |
| Average Wage of Urban Employees | Average annual wages of city staff | Chinese Urban Statistical Yearbook |
| Per Capita GDP | City's annual regional gross product per capita | Chinese Urban Statistical Yearbook |
| Average Annual Population | City's annual average annual population | Chinese Urban Statistical Yearbook |
| Residential Investment | City's annual investment in residential development | Chinese Urban Statistical Yearbook |
| Household Savings Balance | City's annual savings balance of urban and rural residents | Chinese Urban Statistical Yearbook |
| City Deposit Balance | City's annual deposit balance of financial institution | Chinese Urban Statistical Yearbook |
| City Loan Balance | City's annual loan balance of financial institutions | Chinese Urban Statistical Yearbook |
| Commercial Housing Sales Area | City's annual sales area of commodity housing | Chinese Urban Statistical Yearbook |
| Commercial Housing Sales | City's annual total sales of commodity housing | Chinese Urban Statistical Yearbook |
| Bank Revenue | Annual revenue of each bank | Chinese Commercial Banks Statistical Yearbook |
| Bank Operating Expenses | Annual operating expenses of each bank | Chinese Commercial Banks Statistical Yearbook |
| Bank Deposit Balance | Annual deposits of each bank | Chinese Commercial Banks Statistical Yearbook |
| Bank Total Loans | Annual total loans of each bank | Chinese Commercial Banks Statistical Yearbook |

Notes: This table includes the definitions and data sources of main variables

**WEB APPENDIX B. ADDITIONAL ANALYSES**

**B.1. Sun and Abraham (2021) Estimation**

Given the staggered implementation of the HPR policy across cities, we employ the “interaction-weighted” estimation method proposed by Sun and Abraham (2021), which provides more robust estimates of treatment effect heterogeneity. Specifically, this method estimates the dynamic effects of the HPR policy by computing the weighted average coefficients of treatment effects for each city cohort over time relative to treatment. It then takes a linear combination of these coefficients to obtain the average treatment effect of the HPR policy. The estimation proceeds in three steps: first, estimating the treatment effect for each relative time by cohort; second, computing a sample-size-weighted average of these effects to obtain the overall effect for each relative time; and finally, averaging these overall effects to derive the average treatment effect.

We define the treatment initiation period as cohort . If a city never adopts the HPR policy treatment, then . For city , the relative time at period is defined as , where is missing for untreated cities. Next, we generate the cohort-relative time interaction term: , which indicates that city belongs to cohort and is at relative time .

Step 1: We estimate the treatment effect at relative time 𝑒 for each cohort using the following specification:

*=* +*++ +**+**+*

Where denotes the initial treatment year of city , according to which cities first treated at the same year. are categorized into disjoint cohorts (i.e., cohort treated in 2010 or 2011); is an indicator for city being  years away from the initial implementation of HBR policy in year . For the never-treated cities in control cohort, and for all and *.* The benchmark pre-period is omitted to avoid collinearity. All other variables are the same as that in Equation in the main text of the paper.

Step2: We estimate the weights for each year. Following Sun and Abraham (2021), we calculate the weighted average of the estimates for each relative time for each cohort :

Weight is cohort ’s sample proportion at relative time ：

Where is sample size of cohort in relative time .

Step3: We combine the treatment effect estimates returned from Step 1 and the weight estimates returned form Step 2, to form the interaction-weighted (IW) estimator:

First, we calculate the overall effect at each relative time , by taking the weighted average across different cohorts . Then, we compute the weighted average across all relative times to obtain the final HPR policy's average treatment effect .

**B.3. Falsified Treatment Procedure**

The instrumental variable (IV) placebo test, a method widely endorsed in the literature (Chetty et al., 2009; Ferrara et al., 2012). Initially, based on Equation (1), the specification for the coefficient can be derived as:

In this equation, the variable encompasses all other control variables and fixed effects, while γ denotes the influence of unobserved factors on the dependent variable. If γ = 0, then suggests that unobserved factors do not bias the estimation results, establishing the unbiased nature of the estimated coefficient,. However, direct verification of this assertion is elusive. To address this challenge, we employ a placebo test method, designating a theoretically irrelevant variable as a substitute for , which is anticipated not to impact the outcome variable. As is randomly generated, β should be equal to 0; However, due to unobserved factor exists, , which denoted as a non-zero estimated coefficient for this irrelevant variable, signals a flaw in the estimation equation. Thus, will change around zero as changes and shows a normal distribution. Specifically, following Chetty et al. (2009), we can randomly assign a false treatment status of cities implementing HPR, generating an erroneous estimate, . This process is iterated 500 times, yielding 500 . We can plot these 500 and the results in the Figure. If the distribution of and the corresponding p-values, revealing that clusters around zero and conforms to a normal distribution, aligning with placebo test expectations, thereby reinforcing the robustness of our estimation results in equation .

Figure B1 shows the distribution of 500 random and the corresponding p-values reveals that these 500 random values cluster around zero and conform to a normal distribution. Moreover, the estimated value of the baseline model, 0.0188, lies outside the 95% confidence interval of the coefficient distribution, aligning with the expectations of the placebo test. This suggests that, beyond the impact of HPR, the evolving trends in the expansion of bank retail branches among restricted and unrestricted cities are not attributable to previously unobserved factors.


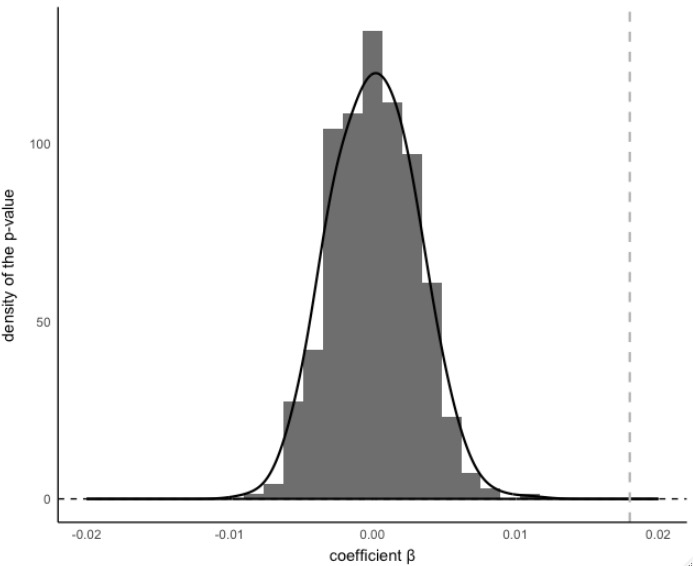
Figure B1. Results of 500 random samples of the randomized treatment group

Notes: The figure plots the distributions of the estimated coefficients of the falsified treatment variable that are constructed based on the randomly designated treatment group from the 500 simulation tests using the benchmark specification. The horizontal axis represents the estimated coefficient , and the vertical axis shows the kernel density of the p-values. The vertical dashed line indicates the estimate from the baseline regression model, which clearly lies outside the 95% confidence interval.

**B.4. Residents’ General Living Expenditure Estimation**

As we discussed in Hypothesis 2, HPR may promote residents to increase their retail goods consumption, thereby incentivizing banks to expand their retail branches to provide more convenient services for residents. To verify our logic, we use city-level goods consumption data from the Chinese Urban Statistical Yearbook and household-level consumption data from the China Family Panel Studies (CFPS). To explore the impact of HPR on city residents’ overall living consumption, we consider the following DID regression equation:

*=*× + *+++*

In the equation, represents the total retailing goods sales growth and the Consumer Price Index (CPI) for city *i* in year *t* when using city level consumption data, or household total consumption expenditure, household other expenditure excluding housing purchases, and total housing expenditures for family *i* in year *t* when using household level consumption data. comprises a series of control variables about city characteristics or family characteristics, represents city or household fixed effects, represents time fixed effects, and is the error term in the DID model. We estimate the HPR on residents’ general living consumption by using the standard DID (two-way fixed effects) method.

**WEB APPENDIX C. SUPPLEMENTAL ROBUSTNESS TESTS**

In this subsection, we provide further analyses to check the robustness of our results and the validity of our identification strategy.

**C.1. Falsified HPR Time**

*Falsified HPR Month.* Using the subsample from January 2008 to December 2009 before the treatment, we conducted a falsification test on the implementation months of the HPR policy in the treated cities. If the monthly increase bank retail branches are related to unobserved confounding factors in the treated cities rather than the actual effects of the HPR, we would expect to find significant effects in the falsification tests. The results in Table C1 shows that the falsified treatment variable has no significant effects, where we used January 2009 (the midpoint of the pre-treatment sample) as a fictitious time for the implementation of the HPR policy, thereby reinforcing the robustness of our estimation results.

| Table C1 Robustness Checks: Falsified HPR Month | | | | |
| --- | --- | --- | --- | --- |
|  | Dependent variable: Log. NBankApproval | | | |
|  | (1) | (2) | (3) | (4) |
| Limit×After | 0.00042 | -0.00418 | -0.00418 | -0.00284 |
|  | (0.00612) | (0.00697) | (0.00672) | (0.00641) |
| Controls | No | Yes | Yes | Yes |
| Time fixed effects | Yes | Yes | Yes | Yes |
| City fixed effects | Yes | No | No | Yes |
| Bank fixed effects | Yes | No | Yes | Yes |
| Si×f(t) | No | Yes | Yes | Yes |
| Observations | 128,592 | 128,592 | 128,592 | 128,592 |
| R2 | 0.08039 | 0.04936 | 0.09134 | 0.09840 |
| Adjusted R2 | 0.07807 | 0.04905 | 0.09092 | 0.09601 |

Note: This table shows the estimation results by using the standard DID (two-way fixed effects) method. The dependent variables are indicated on the top column. All regressions use the subsample in the pre-treatment period of January 2008 to December 2009 to conduct falsification test, where January 2009 is used as the falsified month of the HPR policy implementation (so that no staggered feature involved). Control variables include city characteristics and bank characteristics. “Si×f(t)” represents the interaction terms between the key criterion for selecting housing purchase restriction cities (i.e., the average housing price and its month growth rate from 2004 to 2009) and a third-order polynomial function of time. Standard error has been cluster-adjusted at both city and bank levels. ***, **, * represent significance levels at 1%, 5%, and 10%, respectively.

**C.2. Matching Strategy (PSM-DID)**

Considering that both speculative housing demand and other unobserved city factors may also change after the implementation of HPR, which promotes bank retail branches expansion. To minimize interference from other confounding factors to the greatest extent possible, we use propensity score matching method to construct comparable cities (Rosenbaum and Rubin 1985). DID estimation based on the matched sample, instead of the raw sample, is much less susceptible to selection issues that arise from unobserved differences in city characteristics (Tucker et al. 2013, Wang et al. 2016, Zhang et al. 2022). Specifically, for each city, we estimated a propensity score based on observed city characteristics such as regional gross product per capita, average wages of staff, average annual population and average price of commodity housing. Within each city (i.e., Beijing), we used the estimated propensity score to find comparable city listed before and after the implementation of HPR, using a caliper threshold of 0.5. We implemented the matching using the k-nearest-neighbor matching algorithm in the MatchIt package in R. We conducted matching for all 46 restricted cities and minimized cities differences resulting from selection into the implementation of HPR and other unobserved factors in restricted cities and unrestricted cities (Guo and Fraser, 2014). Table C2 summarizes t-test results for these restricted and unrestricted cities on the variables mentioned earlier and after matching. Results indicate that restricted cities have significantly larger values on all explanatory variables before matching, and the differences are not significant after matching. Our final matched dataset comprised 54 cities, with 27 in the treatment group (implementing HPR) and 27 in the control group (not implementing HPR).

Table C2 Differences in Control Variables Between Treatment and Control Groups before and after Matching

|  | Before Matching | | |  | After Matching | | |
| --- | --- | --- | --- | --- | --- | --- | --- |
|  | Control Group | Treatment Group | p |  | Control Group | Treatment Group | p |
| City | 239 | 46 |  |  | 27 | 27 |  |
| AvgGdp | 23764.50 (16705.39) | 50713.20 (23318.44) | <0.001 |  | 40614.11 (25767.74) | 42849.44 (18496.22) | 0.716 |
| AvgWage | 26087.37 (5466.00) | 36224.01 (7515.53) | <0.001 |  | 31820.11 (6153.60) | 35516.31 (8756.70) | 0.079 |
| AvgPop | 400.96 (293.01) | 584.96  (314.80) | <0.001 |  | 534.46 (591.22) | 614.32  (336.87) | 0.545 |
| HousePrice | 3603.24 (1076.50) | 8276.34 (3784.54) | <0.001 |  | 5756.06 (1107.65) | 7076.45 (4092.95) | 0.112 |

Note: This table shows differences in control variables between treatment and control groups before and after matching. There are significant differences in the control variables between the treatment group and the control group cities before matching, but after matching, the differences in the control variables between the treatment group and the control group cities become insignificant.

Based on the matched sample, the estimation results, as shown in Table C3, continue to indicate a positive and statistically significant coefficient of the HPR on bank retail branches expansion, albeit with a slightly smaller coefficient when time fixed effects (see Column (1)), controls (see Column (2)), or all fixed effects (see Column (4)) are included. As shown in Column (4), relative to the control cities, the monthly number of bank retail branches in the treated cities increase by 1.28% after the implementation of the HPR policy, which is slightly smaller than the coefficient based on the raw samples. Overall, using the PSM-DID method, we again reaffirm the robustness of the estimation results of HPR on bank retail branches expansion.

| Table C3 Robustness Checks: Matched Samples of the HPR Policy on Bank Retail Branches Expansion | | | | |
| --- | --- | --- | --- | --- |
|  | *Dependent variable:* Log. NBankApproval | | | |
|  | (1) | (2) | (3) | (4) |
| Limit×After | 0.01952*** | 0.01787** | 0.02303*** | 0.01285* |
|  | (0.00710) | (0.00788) | (0.00778) | (0.00727) |
| Controls | No | Yes | No | Yes |
| Time fixed effects | Yes | No | Yes | Yes |
| City fixed effects | No | Yes | No | Yes |
| Bank fixed effects | No | Yes | Yes | Yes |
| Si×f(t) | Yes | No | No | Yes |
| Observations | 82,992 | 82,992 | 82,992 | 82,992 |
| R2 | 0.06980 | 0.07022 | 0.08859 | 0.09345 |
| Adjusted R2 | 0.06865 | 0.06926 | 0.08690 | 0.09159 |

Note: This table shows the estimation results by using the staggered DID method proposed by Sun and Abraham (2021). All regressions use the matched sample from raw sample by using propensity score matching method. The dependent variables are indicated on the top column. Control variables include city characteristics and bank characteristics. “Si×f(t)” represents the interaction terms between the key criterion for selecting housing purchase restriction cities (i.e., the average housing price and its month growth rate from 2004 to 2009) and a third-order polynomial function of time. Standard error has been cluster-adjusted at both city and bank levels. ***, **, * represent significance levels at 1%, 5%, and 10%, respectively.

**REFERENCES FOR WEB APPENDICES**

Chetty R, Looney A, Kroft K (2009) Salience and taxation: Theory and evidence. *American Economic Review*. 99(4), 1145-1177.

Ferrara EL, Chong A, and Duryea S (2012) Soap operas and fertility: Evidence from Brazil. *American Economic Journal: Applied Economics*. 4(4), 1-31.

Guo S, Fraser M. W (2014) Propensity score analysis: Statistical methods and applications. Washington: SAGE publications.

Rosenbaum P R, Rubin D B (1985) Constructing a control group using multivariate matched sampling methods that incorporate the propensity score. *The American Statistician*. 39(1), 33-38.

Sun, L., Abraham, S (2021) Estimating dynamic treatment effects in event studies with heterogeneous treatment effects. *Journal of Econometrics*, 225(2), 175-199.

Tucker C, Zhang J, Zhu T (2013) Days on market and home sales. *The RAND Journal of Economics*. 44(2), 337–360.

Wang Y, Lewis M, Cryder C, and Sprigg J (2016) Enduring effects of goal achievement and failure within customer loyalty programs: A large-scale field experiment. *Marketing Science*. 35(4), 565–575.

Zhang S, Lee D, Singh P, Mukhopadhyay T (2022) Demand interactions in sharing economies: Evidence from a natural experiment involving Airbnb and Uber/Lyft. *Journal Marketing Research*. 59(2), 374–391.

Zhang, S., Mehta, N., Singh, P. V., & Srinivasan, K (2021) Frontiers: Can an artificial intelligence algorithm mitigate racial economic inequality? An analysis in the context of Airbnb. *Marketing Science*, 40(5), 813-820.
